# Supplementary material for: Evaluating Polymers Interplay to Investigate Lignocellulose Recalcitrance
Source: Research Square preprint supplement (doi:10.21203/rs.3.rs-452185/v1), 2021-05-06
Supplement: Supplementary file 1 [file aec51a2db82683bba3dd891c.xlsx]

## Sheet: Feuil1
		T2 (ms)			P2 (%)			PW (%)
M7	Raw	2.2	11		93	7		114	22
		(± 0.4)	(± 3)		(± 4)	(± 4)		(± 5)	(± 9)
	HWP 20 min	2.1	18		99.1	0.9		73	8
		(± 0.1)	(± 7)		(± 0.3)	(± 0.3)		(± 11)	(± 5)
	HWP 40 min	2.2	17		99	1		58	8
		(± 0.1)	(± 7)		(± 0.5)	(± 0.5)		(± 7)	(± 3)
M9	Raw	3.3	18		91	9		130	34
		(± 0.3)	(± 1)		(± 0.6)	(± 0.6)		(± 19)	(± 1)
	HWP 20 min	2	19		99.2	0.8		69	10
		(± 0.3)	(± 3)		(± 0.4)	(± 0.4)		(± 8)	(± 4)
	HWP 40 min	2	20		99.5	0.5		63	8
		(± 0.3)	(± 3)		(± 0.5)	(± 0.5)		(± 4)	(± 1)
